# Supplementary material
Source: ML conference proceedings conference paper supplement (https://openaccess.thecvf.com/content/ICCV2021/html/Feng_Exploring_Classification_Equilibrium_ICCV_2021_paper.html)
Supplement: Supplementary file 1 [file Feng_Exploring_Classification_Equilibrium_ICCV_2021_supplemental.pdf]

# – Supplementary material –

## Exploring Classification Equilibrium in Long-Tailed Object Detection

### 1. Implementation details

Here we elaborate on the more detailed implementations for the experiments in ablation study.

**Feature memory module.** The memory size  $M$  is set to 80, which can store five latest instance features for each category. Thus, we initialize the memory features by randomly selecting 5 instances per class. In addition, an image may contain multiple instances of the same category (*e.g.*,  $> 20$  instances) on LVIS. For simplicity and efficiency, we randomly select 5 instances to update the feature memory for each category that contains more than 5 instances in an image during the training.

**Dataset-based EBL.** For dataset-based EBL, we use the number of the training instances of each category to compute the loss margin as follow:

$$\delta_{yy'} = \log\left(\frac{n_{y'}}{n_y}\right), \quad (1)$$

where  $n_y$  is the number of the training instances of category  $y$ . As the score-based EBL, we use a small value  $\hat{n}_{C+1}$  to replace  $n_{C+1}$  (*i.e.*, the number of the training instances of background) to reduce the false positive cases. In our experiments,  $\hat{n}_{C+1}$  is set to 1.

**Dataset-based MFS.** The bounding box generator and the feature memory module of dataset-based MFS are the same as those of score-based MFS, while the probabilistic sampler of dataset-based MFS uses the sampling probability based on the number of the training instances of each category. Namely, the sampling probability is computed as follow:

$$p_y = \frac{f(n_y)}{\sum_{y'} f(n_{y'})}, \quad (2)$$

where:

$$f(n_y) = \frac{1}{n_y}. \quad (3)$$

**Repeat factor sampling (RFS).** RFS over-samples the images containing the tail classes by increasing the sampling rate for these categories. As demonstrated in [1], we use the best setting of RFS that over-samples the categories that appear in less than 0.1% of the total images.

### References

- [1] Agrim Gupta, Piotr Dollar, and Ross Girshick. Lvis: A dataset for large vocabulary instance segmentation. In *Proceedings of the IEEE Conference on Computer Vision and Pattern Recognition*, pages 5356–5364, 2019.
